# Supplementary material for: Visible-blind ultraviolet narrowband photomultiplication-type organic photodetector with an ultrahigh external quantum efficiency of over 1 000 000%
Source: Royal Society of Chemistry journal article supplement (doi:10.1039/d1mh00776a), 2021-01-01
Supplement: d1mh00776a1.pdf [file d1mh00776a1.pdf]

## Electronic Supplementary Information

### Visible-Blind Ultraviolet Narrowband Photomultiplication-Type Organic Photodetector with an Ultrahigh External Quantum Efficiency over 1000000%

Dechao Guo,<sup>ab</sup> Liqing Yang,<sup>a</sup> Jingcheng Zhao,<sup>a</sup> Ji Li,<sup>a</sup> Guo He,<sup>a</sup> Dezhi Yang,<sup>\*a</sup> Linge  
Wang,<sup>\*b</sup> Agafonov Vadim,<sup>c</sup> and Dongge Ma<sup>\*a</sup>

<sup>a</sup> Center for Aggregation-Induced Emission, Institute of Polymer Optoelectronic Materials and Devices, Guangdong Provincial Key Laboratory of Luminescence from Molecular Aggregates, State Key Laboratory of Luminescent Materials and Devices, South China University of Technology, Guangzhou 510640, People's Republic of China.

E-mail: [msdgm@scut.edu.cn](mailto:msdgm@scut.edu.cn); [msdzyang@scut.edu.cn](mailto:msdzyang@scut.edu.cn)

<sup>b</sup> South China Advanced Institute for Soft Matter Science and Technology, School of Molecular Science and Engineering, Guangdong Provincial Key Laboratory of Functional and Intelligent Hybrid Materials and Devices, South China University of Technology, Guangzhou 510640, China.

E-mail: [lingewang@scut.edu.cn](mailto:lingewang@scut.edu.cn)

<sup>c</sup> Moscow Institute of Physics and Technology, Dolgoprudny, Moscow Region, 141700, Russia

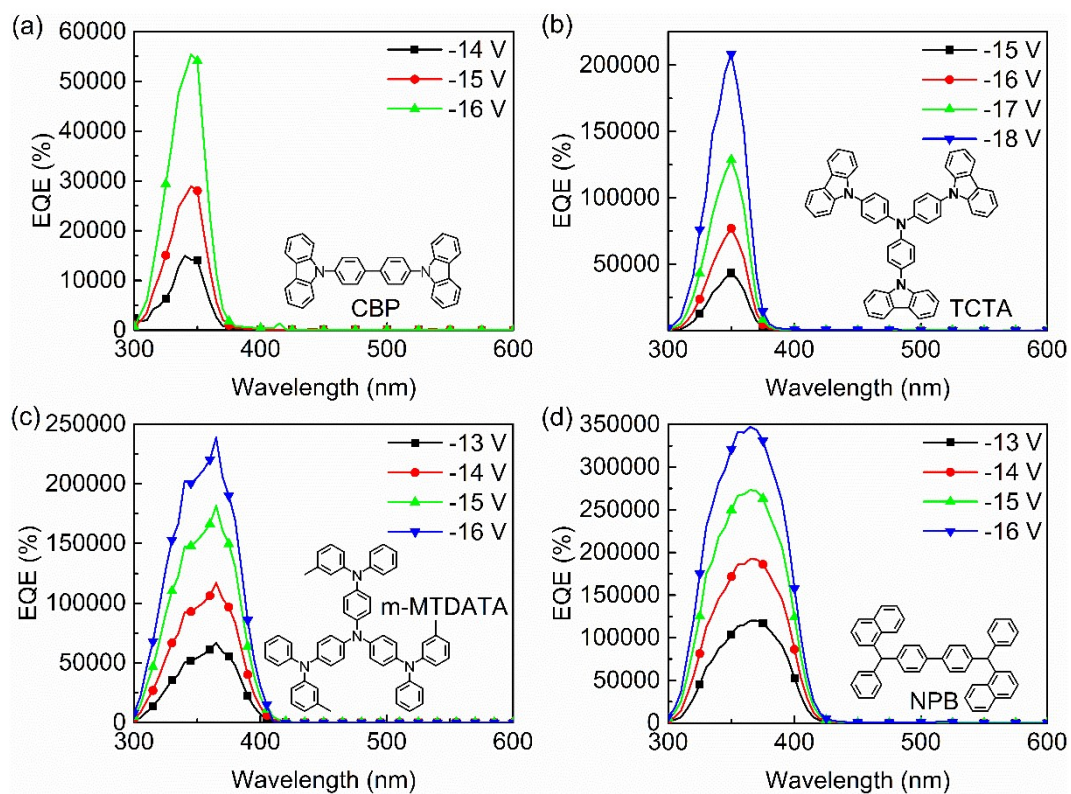

**Figure S1.** EQE spectral response characteristics of the fabricated UV PM-type OPDs with different active materials. (a) CBP, (b) TCTA, (c) m-MTDATA, (d) NPB

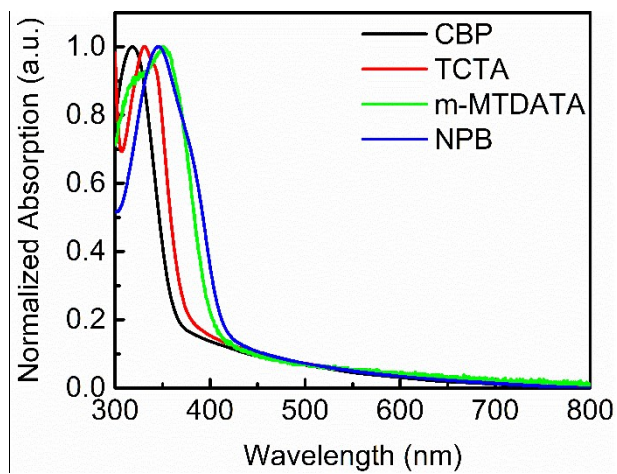

**Figure S2.** Normalized absorption spectra of CBP, TCTA, m-MTDATA, and NPB film.

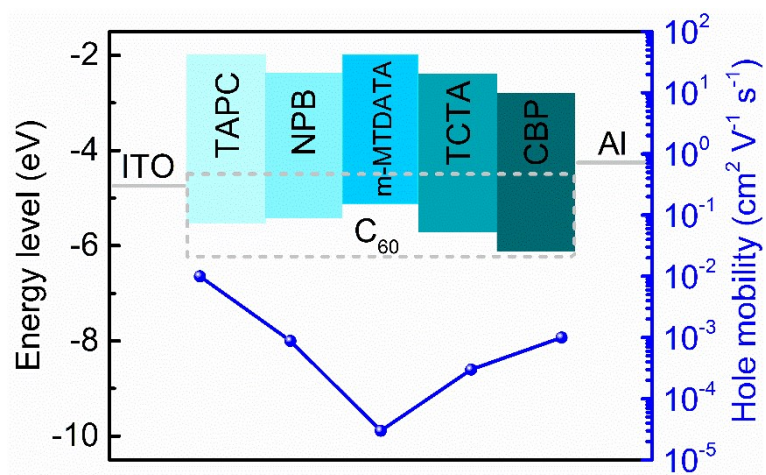

**Figure S3.** Energy level and hole mobility statistics of wide bandgap organic semiconductor materials.

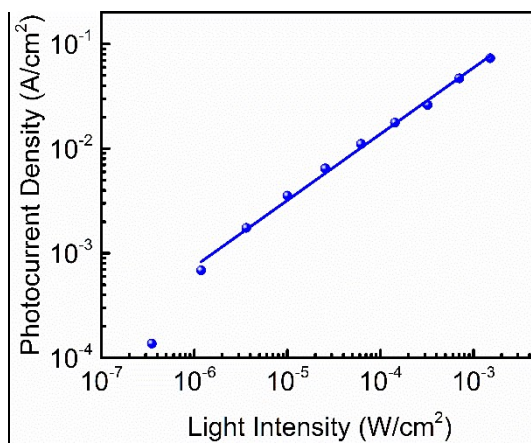

**Figure S4.** Incident light intensity-photocurrent density of the fabricated UV PM-type OPDs under -14 V bias voltage.

Chemical structures of the organic materials used in OLEDs and energy level of OLEDs are shown in **Figure S5a** and **Figure S5b**. The device efficiencies versus luminance characteristics, EL spectra at a luminance of 1000 cd/m<sup>2</sup>, and current density-luminance-voltage characteristics are depicted in **Figure S5c** and **Figure S5d**. The maximum current efficiency (*CE*) and power efficiency (*PE*) reach 83.3 cd/A and 89.2 lm/W, respectively. The turn-on (*V<sub>on</sub>*) voltage of resulting OLEDs is about 2.6 V.

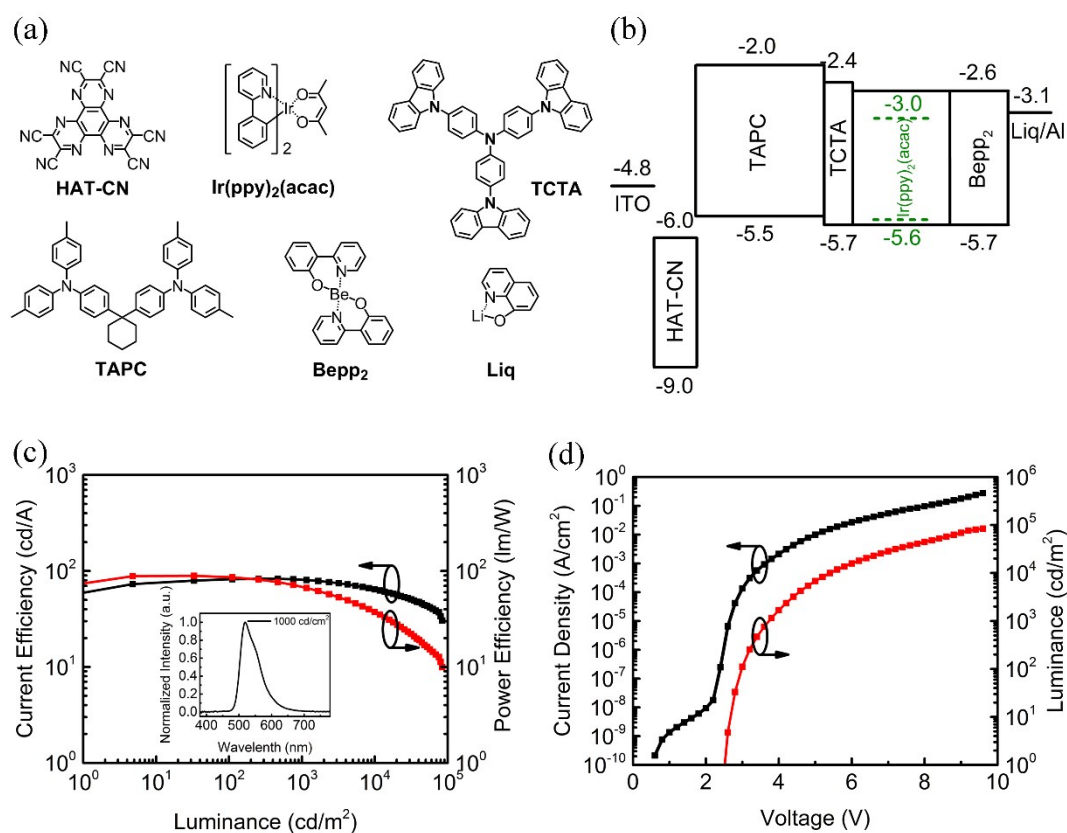

**Figure S5.** (a) The chemical structure of organic materials used in OLEDs. (b) The energy level diagram of OLEDs. (c) Current efficiency and power efficiency versus luminance characteristics of OLEDs. Insert: EL spectra of OLEDs at a luminance of 1000 cd/m<sup>2</sup>. (d) Current density and luminance versus driving voltage characteristics of OLEDs.

**Table S1** Performance comparison of the typical UV photodetectors.

| Materials             | Wavelength (nm) | R (A/W) | D* (Jones)            | Response time | Reference    |
|-----------------------|-----------------|---------|-----------------------|---------------|--------------|
| PVK:ZnO               | 360             | 721     | $3.4 \times 10^{15}$  | -             | 1            |
| NiO/ZnO               | 350             | 10.2    | $4.66 \times 10^{12}$ | 200 ms        | 2            |
| MCP:TiO <sub>2</sub>  | 351             | 240     | $3.72 \times 10^{14}$ | 21 ms         | 3            |
| Graphene<br>ZnO       | 340             | 36      | $1.3 \times 10^{12}$  | -             | 4            |
| PFE:BNDI:<br>ZnO      | 365             | 0.65    | $1.12 \times 10^{14}$ | -             | 5            |
| PDHF/TiO <sub>2</sub> | 280             | 514.8   | $1.86 \times 10^{13}$ | 420 ms        | 6            |
| BFE:ZnO               | 350             | -       | $1.27 \times 10^{13}$ | 11 ms         | 7            |
| PTAA:ZnO              | 350             | 83.2    | $1.6 \times 10^{12}$  | -             | 8            |
| F8T2:ZnO              | 360             | 6.39    | $8.8 \times 10^{11}$  | 16.4 ms       | 9            |
| CsPbCl <sub>3</sub>   | 365             | 2.27    | $1.4 \times 10^{13}$  | 46 $\mu$ s    | 10           |
| ZnO/PCDTBT            | 330             | 499     | $1.74 \times 10^{14}$ | 230 ms        | 11           |
| Au/ZnO                | 365             | 2.6     | $8.18 \times 10^{11}$ | 4 ms          | 12           |
| MAPbCl <sub>3</sub>   | 350             | 0.12    | $6 \times 10^{12}$    | 15 ns         | 13           |
| TAPC:C <sub>60</sub>  | 335             | 2913    | $1.28 \times 10^{14}$ | 390 ms        | Present work |

## References

- 1 F. W. Guo, B. Yang, Y. B. Yuan, Z. G. Xiao, Q. F. Dong, Y. Bi, J. Huang, *Nat. Nanotechnol.* 2012, **7**, 798.
- 2 D. Y. Kim, J. Ryu, J. Manders, J. Lee, F. So, *ACS Appl. Mater. Interfaces* 2014, **6**, 1370.
- 3 D. L. Shao, M. P. Yu, H. T. Sun, G. Q. Xin, J. Lian, S. Sawyer, *ACS Appl. Mater. Interfaces* 2014, **6**, 14690.
- 4 S. Dhar, T. Majumder, S. P. Mondal, *ACS Appl. Mater. Interfaces* 2016, **8**, 31822.
- 5 G. MemişOĞLu, C. Varlikli, *Turk. J. Electr. Eng. Co.* 2016, **24**, 4208.
- 6 D. Z. Zhang, R. L. Xu, L. Sun, C. Chen, F. L. Gao, X. D. Zhang, J. R. Zhou, S. P. Ruan, *J. Phys. Chem. C* 2016, **120**, 26103.
- 7 M. Azadinia, M. R. Fathollahi, M. Mosadegh, F. A. Boroumand, E. Mohajerani, *J. Appl. Phys.* 2017, **122**, 154501.
- 8 M. R. Esopi, E. J. Zheng, X. Y. Zhang, C. Cai, Q. M. Yu, *Phys. Chem. Chem. Phys.* 2018, **20**, 11273.
- 9 X. Y. Zhang, E. J. Zheng, M. R. Esopi, C. Cai, Q. M. Yu, *ACS Appl. Mater. Interfaces* 2018, **10**, 24064.
- 10 L. Yang, W. L. Tsai, C. S. Li, B. W. Hsu, C. Y. Chen, C. I. Wu, H. W. Lin, *ACS Appl. Mater. Interfaces* 2019, **11**, 47054.
- 11 D. Z. Zhang, C. Y. Liu, K. Z. Li, S. P. Ruan, J. R. Zhou, X. D. Zhang, Y. Chen, *J. Alloy. Compd.* 2019, **774**, 887.
- 12 S. Podder, B. Basumatary, D. Gogoi, J. Bora, A. R. Pal, *Appl. Surf. Sci.* 2021, **537**, 147893
- 13 Z. L. Chen, C. L. Li, A. A. Zhumekenov, X. P. Zheng, C. Yang, H. Z. Yang, Y. He, B. Turedi, O. F. Mohammed, L. Shen, O. M. Bakr, *Adv. Optical Mater.* 2019, 1900506.
